# Supplementary material for: Supramolecular assemblies of Zn(ii) complexes with a D–π–A ligand for sensing specific organic molecules
Source: Royal Society of Chemistry journal article supplement (doi:10.1039/d2ce00452f), 2022-01-01
Supplement: d2ce00452f1.pdf [file d2ce00452f1.pdf]

## Electronic Supplementary Information (ESI)

### Supramolecular assemblies of Zn(II) complexes with D- $\pi$ -A ligand for sensing specific organic molecules

Zi-Qing Huang,<sup>a</sup> Jia-Qi Chen,<sup>a</sup> Shu-Man Zhao,<sup>a</sup> Zhao-Feng Qiu,<sup>b</sup> Yue Zhao<sup>a</sup> and Wei-Yin Sun<sup>\*a</sup>

<sup>a</sup> Coordination Chemistry Institute, State Key Laboratory of Coordination Chemistry, School of Chemistry and Chemical Engineering, Nanjing National Laboratory of Microstructures, Collaborative Innovation Center of Advanced Microstructures, Nanjing University, Nanjing 210023, China. E-mail: sunwy@nju.edu.cn; Tel: +86 25 89683485

<sup>b</sup> College of Chemistry and Environmental Engineering, Yangtze University, Jingzhou 434023, China.

\* Corresponding author.

*Email address:* sunwy@nju.edu.cn (W. Y. Sun)

#### EXPERIMENTAL

**X-ray crystallography.** Single-crystal X-ray diffraction data were collected on a Bruker D8 Venture diffractometer with graphite-monochromated Mo K $\alpha$  radiation ( $\lambda = 0.71073$  Å). The integration of diffraction data and intensity corrections for the Lorentz and polarization effects were performed by using SAINT program.<sup>1</sup> Semi-empirical absorption corrections were applied using SADABS program.<sup>2</sup> The structures were solved by direct methods with SHELXT-2014, expanded by subsequent Fourier-difference synthesis, and all the non-hydrogen atoms were refined anisotropically on  $F^2$  using the full-matrix least-squares technique with the SHELXL-2018 crystallographic software package.<sup>3,4</sup> The free solvent molecules in the unit cell

have been taken into account by SQUEEZE option of the PLATON program.<sup>5</sup> The final chemical formulas were determined by volume/count electrons, elemental and TGA. The reported refinements are of the guest-free structures obtained by the SQUEEZE routine and the results were attached to the CIF files. The details of crystal parameters, data collection and refinements for **1**, **2** and **3** are listed in **Table 1**, and the selected bond lengths and angles are given in **Table S1**.

**Theoretical calculations.** First principle DFT calculations were carried out by using the Dmol3 module in Material Studio software package.<sup>6</sup> The initial configuration was fully optimized based on crystal structures of **1**, **2**, **3** and single molecular TNP by the Perdew-Burke-Ernzerhof (GGA-PBE) exchange correlation functional sets with spin-polarization, which is required to describe weak interactions.<sup>7-9</sup> The self-consistent field converged criterion was  $1.0 \times 10^{-5}$  hartree atom<sup>-1</sup>, and the converging criterion of structure optimization was  $1.0 \times 10^{-3}$  hartree bohr<sup>-1</sup>. The Brillouin zone was sampled by  $1 \times 1 \times 1$  k-points, and test calculations reveal that the increase of k-points does not affect the results.

**Table S1** Selected bond lengths (Å) and angles (°) for **1**, **2** and **3**.

| <b>1</b>        |            |                 |            |
|-----------------|------------|-----------------|------------|
| Zn(1)-N(4)      | 2.220(3)   | Zn(1)-N(5)      | 2.071(2)   |
| Zn(1)-N(6)      | 2.188(3)   | Zn(1)-N(7)      | 2.212(2)   |
| Zn(1)-N(8)      | 2.082(2)   | Zn(1)-N(9)      | 2.168(2)   |
| N(5)-Zn(1)-N(4) | 75.08(9)   | N(5)-Zn(1)-N(6) | 76.03(9)   |
| N(5)-Zn(1)-N(7) | 97.39(9)   | N(5)-Zn(1)-N(8) | 172.54(9)  |
| N(5)-Zn(1)-N(9) | 111.94(9)  | N(6)-Zn(1)-N(7) | 94.79(9)   |
| N(6)-Zn(1)-N(4) | 150.96(10) | N(7)-Zn(1)-N(4) | 91.71(9)   |
| N(8)-Zn(1)-N(6) | 104.53(9)  | N(8)-Zn(1)-N(7) | 75.16(9)   |
| N(8)-Zn(1)-N(4) | 104.49(10) | N(8)-Zn(1)-N(9) | 75.49(9)   |
| N(9)-Zn(1)-N(6) | 95.15(9)   | N(9)-Zn(1)-N(7) | 150.51(9)  |
| N(9)-Zn(1)-N(4) | 92.91(9)   |                 |            |
| <b>2</b>        |            |                 |            |
| Zn(1)-O(4)      | 1.962 (2)  | Zn(1)-O(1)      | 1.969(2)   |
| Zn(1)-N(3)      | 2.224(3)   | Zn(1)-N(4)      | 2.081(2)   |
| Zn(1)-N(5)      | 2.234(3)   |                 |            |
| O(4)-Zn(1)-O(1) | 120.78(9)  | O(4)-Zn(1)-N(4) | 111.12(9)  |
| O(4)-Zn(1)-N(5) | 96.83(9)   | O(4)-Zn(1)-N(3) | 101.24(10) |
| O(1)-Zn(1)-N(4) | 128.09(9)  | O(1)-Zn(1)-N(5) | 99.32(9)   |
| O(1)-Zn(1)-N(3) | 93.84(10)  | N(4)-Zn(1)-N(5) | 74.15(10)  |
| N(4)-Zn(1)-N(3) | 74.76(10)  | N(3)-Zn(1)-N(5) | 147.99(10) |
| <b>3</b>        |            |                 |            |
| Zn(1)-O(4)      | 1.9464(15) | Zn(1)-O(2)      | 1.9585(15) |
| Zn(1)-N(3)      | 2.1022(17) | Zn(1)-N(2)      | 2.2086(18) |
| Zn(1)-N(4)      | 2.2325(18) |                 |            |
| O(4)-Zn(1)-O(2) | 120.05(6)  | O(4)-Zn(1)-N(3) | 108.51(7)  |
| O(4)-Zn(1)-N(2) | 103.98(7)  | O(4)-Zn(1)-N(4) | 92.93(6)   |
| O(2)-Zn(1)-N(3) | 131.43(6)  | O(2)-Zn(1)-N(2) | 93.48(6)   |
| O(2)-Zn(1)-N(4) | 101.92(7)  | N(3)-Zn(1)-N(2) | 74.31(6)   |
| N(3)-Zn(1)-N(4) | 73.98(6)   | N(2)-Zn(1)-N(4) | 147.44(7)  |

**Table S2** The member atoms of conjugate rings for **1**, **2** and **3**. (CgI = plane number I).

| <b>1</b> |                   |     |     |     |     |     |
|----------|-------------------|-----|-----|-----|-----|-----|
| CgI      | Ring member atoms |     |     |     |     |     |
| Cg1      | Zn1               | N4  | C19 | C18 | N5  |     |
| Cg2      | Zn1               | N5  | C14 | C13 | N6  |     |
| Cg3      | Zn1               | N7  | C28 | C29 | N8  |     |
| Cg4      | Zn1               | N8  | C33 | C34 | N9  |     |
| Cg5      | N1                | C47 | N3  | N2  | C48 |     |
| Cg6      | N10               | N11 | C2  | N12 | C1  |     |
| Cg7      | N4                | C19 | C20 | C21 | C22 | C23 |
| Cg8      | N5                | C14 | C15 | C16 | C17 | C18 |
| Cg9      | N6                | C9  | C10 | C11 | C12 | C13 |
| Cg10     | N7                | C24 | C25 | C26 | C27 | C28 |
| Cg11     | N8                | C29 | C30 | C31 | C32 | C33 |
| Cg12     | N9                | C34 | C35 | C36 | C37 | C38 |
| Cg13     | C3                | C4  | C5  | C6  | C7  | C8  |
| Cg14     | C39               | C40 | C41 | C42 | C43 | C44 |

  

| <b>2</b> |                   |     |     |     |     |     |
|----------|-------------------|-----|-----|-----|-----|-----|
| CgI      | Ring member atoms |     |     |     |     |     |
| Cg3      | Zn1A              | O1  | C6  | O2  |     |     |
| Cg4      | Zn1               | N3  | C17 | C18 | N4  |     |
| Cg5      | Zn1               | N4  | C22 | C23 | N5  |     |
| Cg6      | N6                | C34 | N8  | N7  | C35 |     |
| Cg7      | N1                | C1  | C2  | C3  | C4  | C5  |
| Cg8      | N2                | C10 | C9  | C8  | C12 | C11 |
| Cg9      | N3                | C13 | C14 | C15 | C16 | C17 |
| Cg10     | N4                | C18 | C19 | C20 | C21 | C22 |
| Cg11     | N5                | C23 | C24 | C25 | C26 | C27 |
| Cg12     | C28               | C29 | C30 | C31 | C32 | C33 |

  

| <b>3</b> |                   |     |     |     |     |     |
|----------|-------------------|-----|-----|-----|-----|-----|
| CgI      | Ring member atoms |     |     |     |     |     |
| Cg1      | Zn1               | N2  | C19 | C18 | N3  |     |
| Cg2      | Zn1               | N3  | C11 | C12 | N4  |     |
| Cg3      | N5                | N6  | C1  | N7  | C2  |     |
| Cg4      | N1                | C28 | C27 | C26 | C30 | C29 |
| Cg5      | N2                | C19 | C20 | C21 | C22 | C23 |
| Cg6      | N3                | C11 | C10 | C9  | C17 | C18 |
| Cg7      | N4                | C12 | C13 | C14 | C15 | C16 |
| Cg8      | C3                | C4  | C5  | C6  | C7  | C8  |

**Table S3** The Cg-Cg distances (Å) between ring centroids for **1**, **2** and **3**.

| <b>1</b> |               |             |    |               |             |
|----------|---------------|-------------|----|---------------|-------------|
|          | CgI->CgJ      | Distance    |    | CgI->CgJ      | Distance    |
| 1        | Cg1->Cg7 #1   | 4.5638 (17) | 22 | Cg1->Cg10 #2  | 4.2112 (18) |
| 2        | Cg1->Cg12 #2  | 4.4870 (18) | 23 | Cg2->Cg10 #2  | 4.2163 (19) |
| 3        | Cg2->Cg12 #2  | 4.4927 (18) | 24 | Cg3->Cg5 #5   | 4.4197 (19) |
| 4        | Cg3->Cg7 #2   | 4.2965 (17) | 25 | Cg3->Cg9 #2   | 4.3678 (18) |
| 5        | Cg3->Cg12 #3  | 4.8883 (19) | 26 | Cg4->Cg6 #7   | 4.8967 (19) |
| 6        | Cg4->Cg7 #1   | 4.4145 (18) | 27 | Cg4->Cg9 #2   | 4.3979 (18) |
| 7        | Cg4->Cg10 #4  | 4.8897 (19) | 28 | Cg5->Cg3 #5   | 4.4196 (19) |
| 8        | Cg5->Cg10 #5  | 3.852 (2)   | 29 | Cg5->Cg11 #6  | 4.9993 (19) |
| 9        | Cg5->Cg14 #6  | 3.723 (2)   | 30 | Cg6->Cg4 #7   | 4.8967 (19) |
| 10       | Cg6->Cg12 #7  | 3.676 (2)   | 31 | Cg6->Cg13 #9  | 3.803 (2)   |
| 11       | Cg7->Cg1 #1   | 4.5637 (17) | 32 | Cg7->Cg7 #1   | 4.0946 (19) |
| 12       | Cg7->Cg8 #1   | 4.9034 (18) | 33 | Cg7->Cg12 #3  | 4.962 (2)   |
| 13       | Cg8->Cg7 #1   | 4.9035 (18) | 34 | Cg9->Cg13 #8  | 4.927 (2)   |
| 14       | Cg9->Cg13 #5  | 4.677 (2)   | 35 | Cg10->Cg4 #3  | 4.8896 (19) |
| 15       | Cg10->Cg5 #5  | 3.852 (2)   | 36 | Cg10->Cg12 #3 | 3.563 (2)   |
| 16       | Cg10->Cg13 #5 | 4.374 (2)   | 37 | Cg11->Cg5 #9  | 4.9995 (19) |
| 17       | Cg12->Cg3 #4  | 4.8884 (19) | 38 | Cg12->Cg6 #7  | 3.676 (2)   |
| 18       | Cg12->Cg10 #4 | 3.563 (2)   | 39 | Cg13->Cg6 #6  | 3.803 (2)   |
| 19       | Cg13->Cg9 #8  | 4.927 (2)   | 40 | Cg13->Cg10 #5 | 4.374 (2)   |
| 20       | Cg13->Cg14 #6 | 4.793 (2)   | 41 | Cg14->Cg5 #9  | 3.723 (2)   |
| 21       | Cg14->Cg13 #9 | 4.793 (2)   |    |               |             |

  

| <b>2</b> |              |           |    |               |             |
|----------|--------------|-----------|----|---------------|-------------|
|          | CgI->CgJ     | Distance  |    | CgI->CgJ      | Distance    |
| 1        | Cg3->Cg10 #1 | 4.957 (3) | 13 | Cg7->Cg12 #1  | 4.507 (2)   |
| 2        | Cg3->Cg11 #1 | 4.856 (3) | 14 | Cg8->Cg9 #2   | 4.764 (2)   |
| 3        | Cg6->Cg7 #3  | 4.211 (2) | 15 | Cg9->Cg8 #4   | 4.944 (2)   |
| 4        | Cg7->Cg6 #5  | 4.211 (2) | 16 | Cg10->Cg3 #1  | 4.957 (3)   |
| 5        | Cg8->Cg9 #6  | 4.944 (2) | 17 | Cg11->Cg3 #1  | 4.856 (3)   |
| 6        | Cg9->Cg7 #7  | 4.905 (2) | 18 | Cg11->Cg6 #6  | 4.821 (2)   |
| 7        | Cg9->Cg8 #2  | 4.764 (2) | 19 | Cg11->Cg10 #1 | 3.7287 (19) |

|    |               |             |    |               |             |
|----|---------------|-------------|----|---------------|-------------|
| 8  | Cg10->Cg11 #1 | 3.7285 (19) | 20 | Cg11->Cg11 #1 | 4.491 (2)   |
| 9  | Cg11->Cg4 #1  | 3.8523 (18) | 21 | Cg11->Cg10 #6 | 3.6942 (19) |
| 10 | Cg3->Cg11 #8  | 4.270 (3)   | 22 | Cg12->Cg7 #1  | 4.507 (2)   |
| 11 | Cg4->Cg11 #1  | 3.8523 (18) | 23 | Cg12->Cg11 #4 | 3.6943 (19) |
| 12 | Cg6->Cg11 #4  | 4.821 (2)   |    |               |             |

---

**3**

|    | CgI->CgJ    | Distance    |    | CgI->CgJ    | Distance    |
|----|-------------|-------------|----|-------------|-------------|
| 1  | Cg1->Cg7 #1 | 3.8704 (12) | 12 | Cg5->Cg4 #8 | 4.9432 (12) |
| 2  | Cg2->Cg7 #1 | 3.4880 (12) | 13 | Cg6->Cg7 #1 | 3.8434 (12) |
| 3  | Cg3->Cg3 #2 | 3.8092 (18) | 14 | Cg7->Cg2 #1 | 3.4880 (12) |
| 4  | Cg3->Cg7 #3 | 4.9161 (14) | 15 | Cg7->Cg3 #5 | 4.9161 (14) |
| 5  | Cg4->Cg8 #1 | 4.5293 (13) | 16 | Cg7->Cg6 #1 | 3.8434 (12) |
| 6  | Cg5->Cg8 #4 | 3.6999 (13) | 17 | Cg7->Cg7 #1 | 4.4205 (12) |
| 7  | Cg7->Cg1 #1 | 3.8705 (12) | 18 | Cg7->Cg8 #5 | 3.6631 (12) |
| 8  | Cg2->Cg2 #1 | 3.9608 (12) | 19 | Cg8->Cg2 #3 | 4.8088 (11) |
| 9  | Cg2->Cg8 #5 | 4.8087 (11) | 20 | Cg8->Cg5 #4 | 3.6999 (13) |
| 10 | Cg3->Cg4 #6 | 4.2854 (16) | 21 | Cg8->Cg7 #3 | 3.6632 (12) |
| 11 | Cg4->Cg3 #7 | 4.2854 (16) |    |             |             |

Symmetry codes: #1 1-x,-y,1-z; #2 x,y,z; #3 1+x,y,z; #4 -1+x,y,z; #5 1-x,1-y,1-z; #6 x,y,1+z; #7 1-x,-y,-z; #8 -x,1-y,1-z; #9 x,y,-1+z for **1**; #1 -x,1-y,1-z; #2 -x,1-y,-z; #3 1+x,1+y,z; #4 1+x,y,z; #5 -1+x,-1+y,z; #6 -1+x,y,z; #7 -x,-y,1-z; #8 x,y,z for **2**; #1 2-x,1-y,1-z; #2 -x,2-y,-z; #3 -1+x,y,z; #4 1-x,2-y,1-z; #5 1+x,y,z; #6 -1+x,y,-1+z; #7 1+x,y,1+z; #8 2-x,1-y,2-z for **3**.

**Table S4** Hydrogen bonding data of **1**, **2** and **3**.

| <b>1</b>                |                             |                               |                                        |                             |
|-------------------------|-----------------------------|-------------------------------|----------------------------------------|-----------------------------|
| <i>D</i> -H... <i>A</i> | <i>d</i> ( <i>D</i> -H) / Å | <i>d</i> (H... <i>A</i> ) / Å | <i>d</i> ( <i>D</i> ... <i>A</i> ) / Å | <i>D</i> -H... <i>A</i> / ° |
| C(2)-H(2)···O(6) #1     | 0.95                        | 2.56                          | 3.337(4)                               | 139                         |
| C(8)-H(8)···O(4) #2     | 0.95                        | 2.46                          | 3.357(15)                              | 157                         |
| C(12)-H(12)···O(5) #3   | 0.95                        | 2.60                          | 3.330(4)                               | 134                         |
| C(12)-H(12)···O(7) #3   | 0.95                        | 2.58                          | 3.399(5)                               | 144                         |
| C(15)-H(15)···O(7) #3   | 0.95                        | 2.47                          | 3.369(4)                               | 159                         |
| C(17)-H(17)···N(13) #4  | 0.95                        | 2.36                          | 3.280(4)                               | 163                         |
| C(24)-H(24)···O(7) #5   | 0.95                        | 2.53                          | 3.268(5)                               | 134                         |
| C(27)-H(27)···O(2) #6   | 0.95                        | 2.49                          | 3.332(11)                              | 147                         |
| C(27)-H(27)···O(3A) #6  | 0.95                        | 2.41                          | 3.353(15)                              | 171                         |
| C(30)-H(30)···O(3A) #6  | 0.95                        | 2.58                          | 3.522(17)                              | 174                         |
| C(35)-H(35)···O(2A) #3  | 0.95                        | 2.51                          | 3.423(11)                              | 160                         |
| C(38)-H(38)···O(6) #7   | 0.95                        | 2.57                          | 3.178(4)                               | 122                         |
| C(44)-H(44)···O(3) #3   | 0.95                        | 2.42                          | 3.163(15)                              | 135                         |
| C(47)-H(47)···O(4) #2   | 0.95                        | 2.39                          | 3.325(16)                              | 167                         |
| <b>2</b>                |                             |                               |                                        |                             |
| <i>D</i> -H... <i>A</i> | <i>d</i> ( <i>D</i> -H) / Å | <i>d</i> (H... <i>A</i> ) / Å | <i>d</i> ( <i>D</i> ... <i>A</i> ) / Å | <i>D</i> -H... <i>A</i> / ° |
| C(25)-H(25)···N(1) #3   | 0.93                        | 2.53                          | 3.432(5)                               | 163                         |
| C(26)-H(26)···O(2) #4   | 0.93                        | 2.43                          | 3.352(4)                               | 169                         |
| C(29)-H(29)···O(4) #5   | 0.93                        | 2.50                          | 3.271(4)                               | 140                         |
| C(35)-H(35)···O(3) #6   | 0.93                        | 2.46                          | 3.271(6)                               | 145                         |
| <b>3</b>                |                             |                               |                                        |                             |
| <i>D</i> -H... <i>A</i> | <i>d</i> ( <i>D</i> -H) / Å | <i>d</i> (H... <i>A</i> ) / Å | <i>d</i> ( <i>D</i> ... <i>A</i> ) / Å | <i>D</i> -H... <i>A</i> / ° |
| C(2)-H(2)···O(3) #1     | 0.95                        | 2.39                          | 3.234(4)                               | 147                         |
| C(7)-H(7)···O(4) #2     | 0.95                        | 2.38                          | 3.188(2)                               | 143                         |
| C(8)-H(8)···O(3) #1     | 0.95                        | 2.58                          | 3.401(3)                               | 145                         |
| C(14)-H(14)···N(1) #3   | 0.95                        | 2.56                          | 3.478(3)                               | 163                         |
| C(15)-H(15)···O(1) #4   | 0.95                        | 2.41                          | 3.340(3)                               | 166                         |

Symmetry codes: #1 1+x,y,-1+z; #2 -x,1-y,2-z; #3 -x,1-y,1-z; #4 x,y,1+z; #5 1+x,y,z; #6 1-x,1-y,1-z; #7 x,y,z for **1**; #1 -1-x,-y,1-z; #2 -1-x,1-y,-z; #3 x,1+y,z; #4 -1-x,1-y,1-z; #5 1+x,y,z; #6 1+x,1+y,z for **2**; #1 1-x,2-y,1-z; #2 -1+x,y,z; #3 x,y,-1+z; #4 3-x,1-y,1-z for **3**.

**Table S5**  $K_{sv}$  values for fluorescent detecting TNP.

| Sample                                                                                             | $K_{sv}/M^{-1}$     | Ref.      |
|----------------------------------------------------------------------------------------------------|---------------------|-----------|
| <b>1</b>                                                                                           | $3.94 \times 10^4$  | This work |
| <b>2</b>                                                                                           | $4.78 \times 10^4$  | This work |
| <b>3</b>                                                                                           | $5.01 \times 10^4$  | This work |
| $[Zn_2(tipe)(tpe)] \cdot 3MeOH \cdot 13H_2O$                                                       | $2.08 \times 10^4$  | [13]      |
| $[Zn_4(\mu_3-OH)_2(BTC)_2(BBI_4PY)_2] \cdot 10H_2O$                                                | $2.94 \times 10^4$  | [14]      |
| $Cd(NDC)(H_2O)$                                                                                    | $2.385 \times 10^4$ | [15]      |
| $[Zn_2(L)(DMF)_3] \cdot 2DMF \cdot 2H_2O$<br>( $H_4L$ =terphenyl-3,3'',5,5''-tetracarboxylic acid) | $2.61 \times 10^4$  | [16]      |

**Table S6** Standard deviation and limit of detection (LOD) calculation for TNP in DMA suspension.

|                                 | <b>1</b>                  | <b>2</b>                  | <b>3</b>                  |
|---------------------------------|---------------------------|---------------------------|---------------------------|
| 1                               | 753.432676                | 963.690498                | 944.961405                |
| 2                               | 753.733048                | 963.882307                | 944.687457                |
| 3                               | 753.873114                | 963.901308                | 944.858592                |
| Standard deviation ( $\sigma$ ) | 0.22503                   | 0.11661                   | 0.13839                   |
| $K_{sv}$ (m)                    | $3.94 \times 10^4 M^{-1}$ | $4.78 \times 10^4 M^{-1}$ | $5.01 \times 10^4 M^{-1}$ |
| LOD ( $3\sigma/m$ )             | $1.71 \times 10^{-5} M$   | $7.32 \times 10^{-6} M$   | $8.29 \times 10^{-6} M$   |



**Table S7** Standard deviation and LOD calculation for TNP in H<sub>2</sub>O suspension.

|                                 | <b>1</b>                          | <b>2</b>                          | <b>3</b>                          |
|---------------------------------|-----------------------------------|-----------------------------------|-----------------------------------|
| 1                               | 864.656857                        | 820.841933                        | 617.724435                        |
| 2                               | 865.023295                        | 821.048489                        | 617.528418                        |
| 3                               | 865.078827                        | 821.187064                        | 617.988924                        |
| Standard deviation ( $\sigma$ ) | 0.22928                           | 0.173678                          | 0.23110                           |
| $K_{sv}$ (m)                    | $5.88 \times 10^3 \text{ M}^{-1}$ | $6.90 \times 10^3 \text{ M}^{-1}$ | $2.13 \times 10^4 \text{ M}^{-1}$ |
| LOD ( $3\sigma/m$ )             | $1.17 \times 10^{-4} \text{ M}$   | $7.55 \times 10^{-5} \text{ M}$   | $3.25 \times 10^{-5} \text{ M}$   |

**Table S8** Standard deviation and LOD calculation for 4-MB in DMA suspension of **2**.

|                                 | <b>2</b>                          |
|---------------------------------|-----------------------------------|
| 1                               | 980.433837                        |
| 2                               | 980.887501                        |
| 3                               | 980.401471                        |
| Standard deviation ( $\sigma$ ) | 0.22188                           |
| $K_{sv}$ (m)                    | $1.05 \times 10^5 \text{ M}^{-1}$ |
| LOD ( $3\sigma/m$ )             | $6.34 \times 10^{-6} \text{ M}$   |

**Table S9** Standard deviation and LOD calculation for DBDPO in H<sub>2</sub>O suspension.

|                                 | <b>1</b>                          | <b>2</b>                            | <b>3</b>                          |
|---------------------------------|-----------------------------------|-------------------------------------|-----------------------------------|
| 1                               | 693.443260                        | 869.070951                          | 734.395858                        |
| 2                               | 693.975506                        | 869.535634                          | 734.982327                        |
| 3                               | 693.544505                        | 869.519121                          | 734.460143                        |
| Standard deviation ( $\sigma$ ) | 0.22928                           | 0.21527                             | 0.26263                           |
| $K_{sv}$ (m)                    | $1.76 \times 10^2 \text{ M}^{-1}$ | $1.33 \times 10^2 \text{ M}^{-1}$ , | $2.62 \times 10^2 \text{ M}^{-1}$ |
| LOD ( $3\sigma/m$ )             | $3.91 \times 10^{-3} \text{ M}$   | $4.86 \times 10^{-3} \text{ M}$     | $3.01 \times 10^{-3} \text{ M}$   |

**Table S10** Lifetimes of **1**, **2** and **3** dispersed in DMA or water before and after the addition of TNP solution.

| Item                  | DMA      |          |          | H <sub>2</sub> O |          |          |
|-----------------------|----------|----------|----------|------------------|----------|----------|
|                       | <b>1</b> | <b>2</b> | <b>3</b> | <b>1</b>         | <b>2</b> | <b>3</b> |
| Before quenching / ns | 0.65     | 0.74     | 0.46     | 0.91             | 0.78     | 0.50     |
| After quenching / ns  | 0.64     | 0.71     | 0.44     | 0.64             | 0.76     | 0.49     |

**Table S11** Frontier molecular orbital energies for TNP and **1**, **2** and **3** at the generalized gradient approximation PerdewBurke-Ernzerhof (GGA-PBE) level of theory.

| Samples  | VB / eV       | CB / eV       | Energy Gap / eV |
|----------|---------------|---------------|-----------------|
| <b>1</b> | -5.474        | -3.815        | 1.658           |
| <b>2</b> | -6.290        | -4.130        | 2.160           |
| <b>3</b> | -6.399        | -4.235        | 2.164           |
| TNP      | -7.430 (HOMO) | -5.240 (LUMO) | 2.187           |

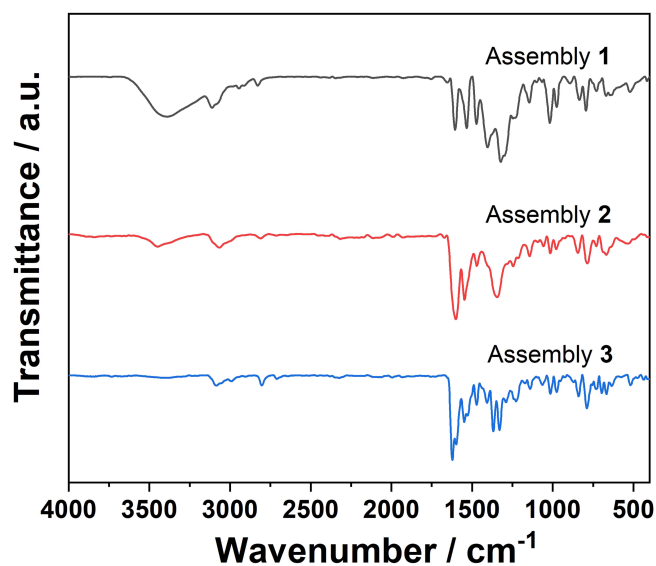

**Fig. S1** FTIR-ATR spectra of **1**, **2** and **3**.

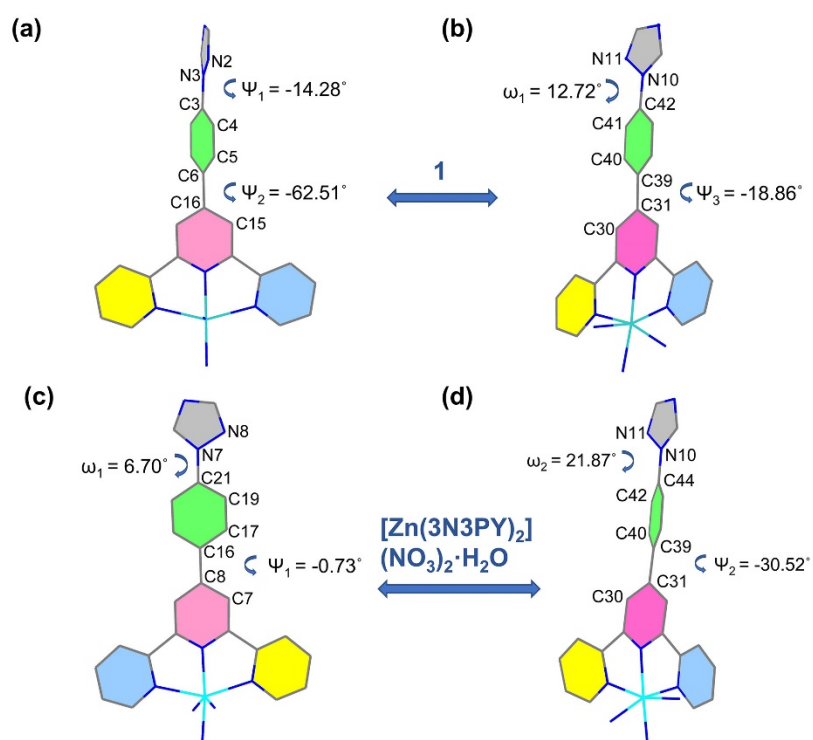

**Fig. S2** Selected torsion angles ( $^\circ$ ) for **1** viewing towards plane  $(h, k, l) = (4, 4, -1)$  (a),  $(4, -13, -1)$  (b) and reported  $[\text{Zn}(\text{3N3PY})_2](\text{NO}_3)_2 \cdot \text{H}_2\text{O}$  to  $(-1, -1, 3)$  (c) and  $(-8, 5, -1)$  (d).

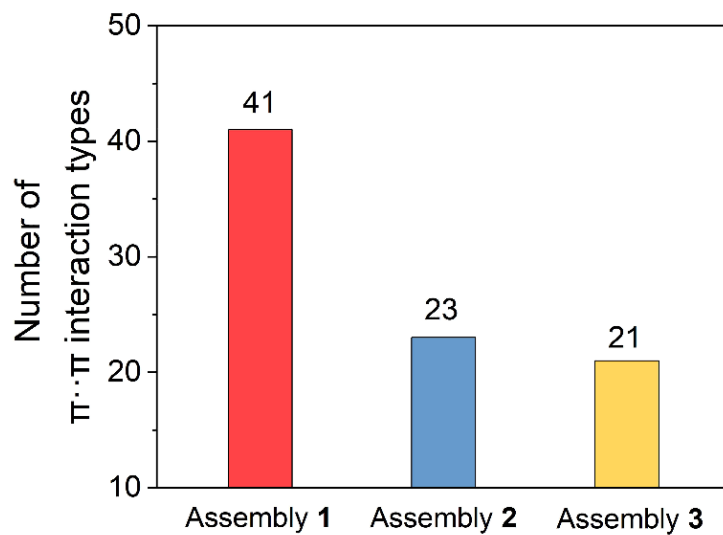

**Fig. S3** The number of  $\pi$ - $\pi$  interaction types for 1, 2 and 3.

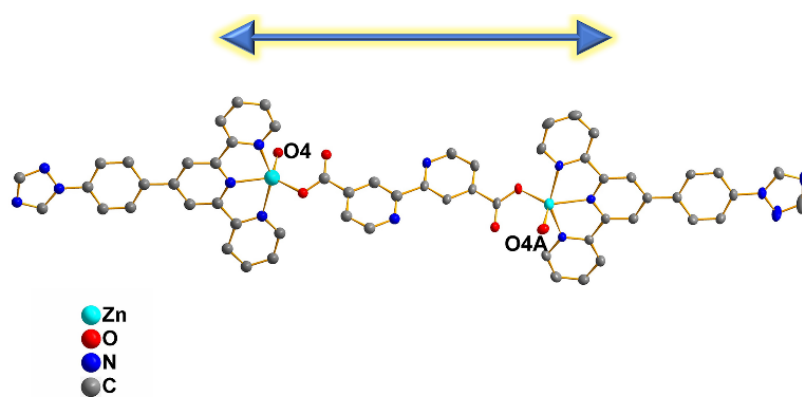

**Fig. S4** Double-arrow unit in 2.

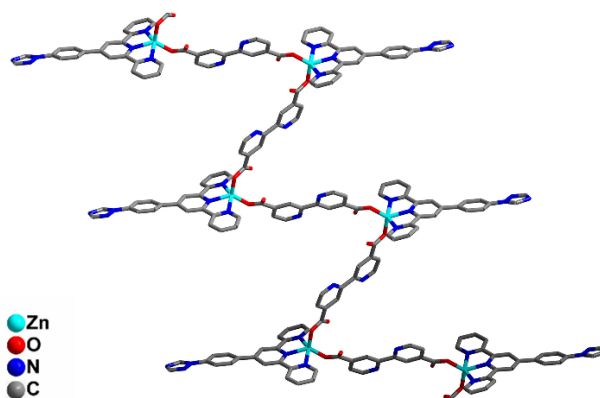

**Fig. S5** 1D chain structure of 2.

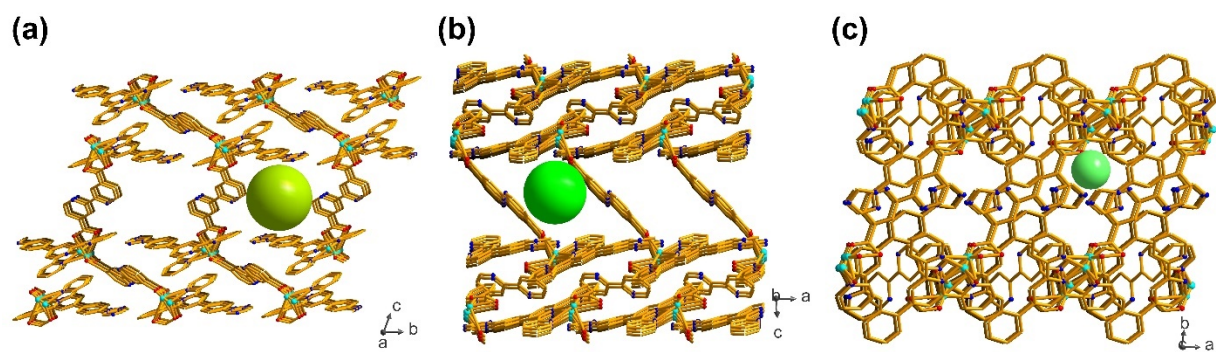

**Fig. S6** The micropores in **2** by the stacking of 1D chains.

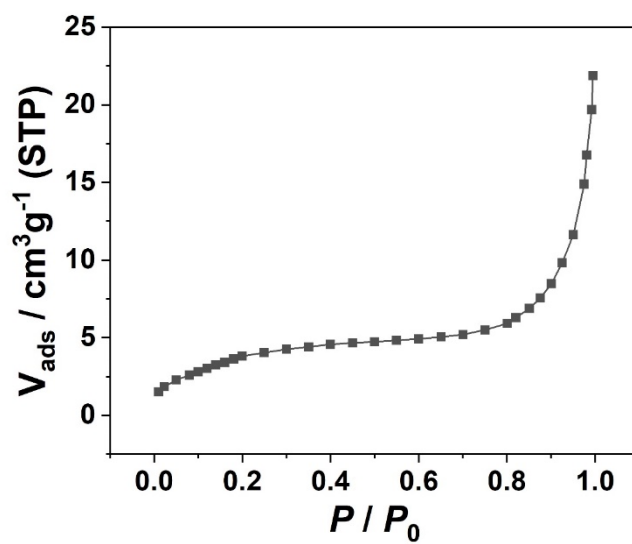

**Fig. S7** N<sub>2</sub> adsorption isotherm at 77 K of assembly **2**.

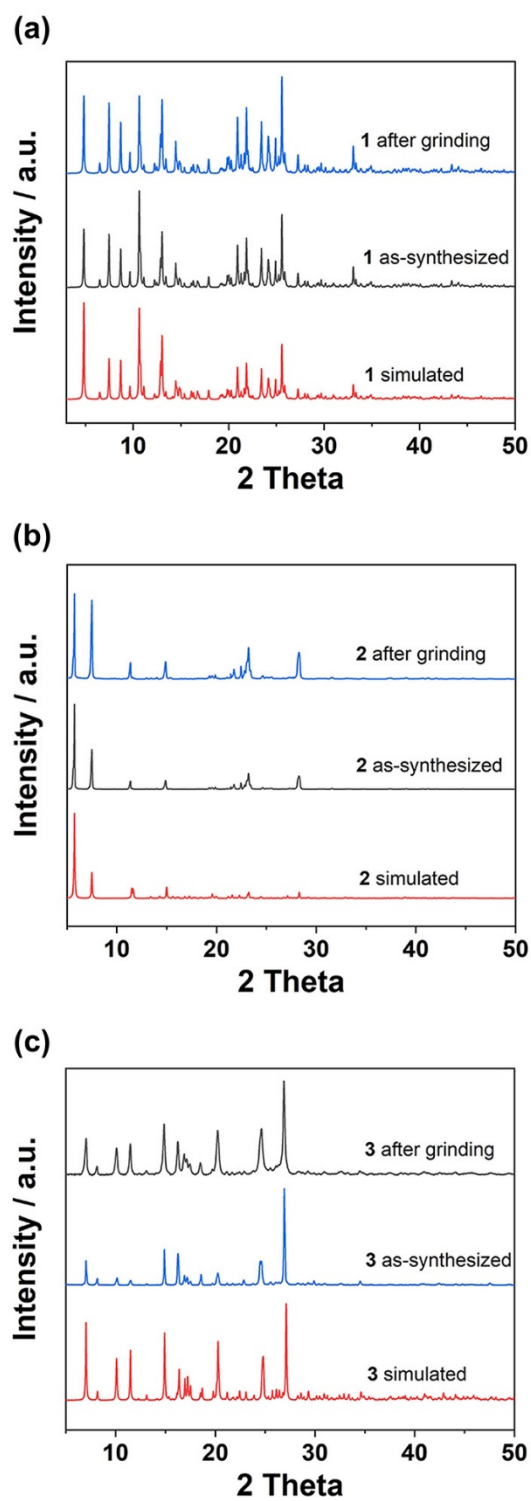

**Fig. S8** PXRd patterns of **1** (a), **2** (b) and **3** (c).

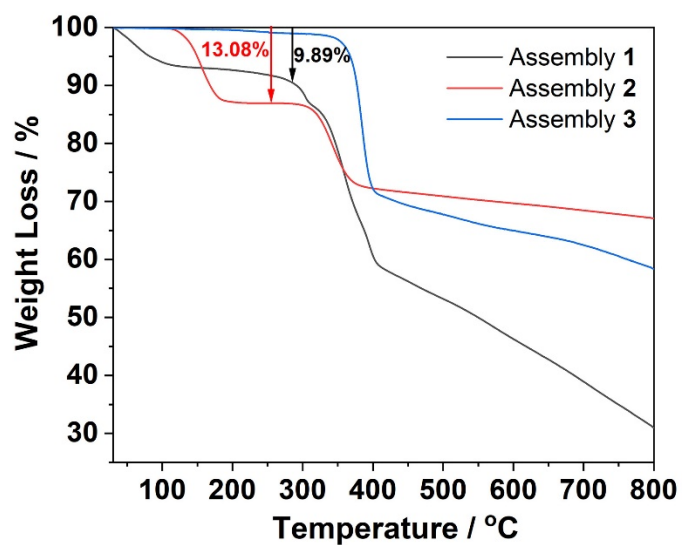

Fig. S9 TG curves of 1, 2 and 3.

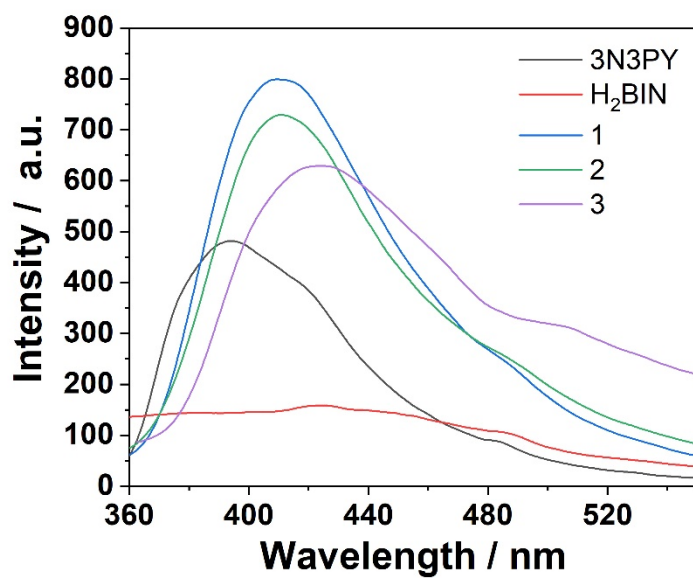

Fig. S10 Photoluminescence spectra of 3N3PY, H<sub>2</sub>BIN, 1, 2 and 3 in solid state ( $\lambda_{\text{ex}} = 330$  nm).

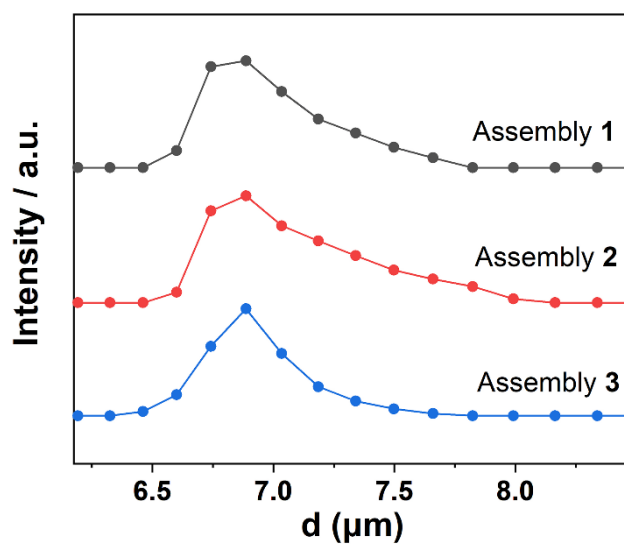

**Fig. S11** DLS results of **1**, **2** and **3** in aqueous suspension.

The quenching efficiency ( $\Phi$ ) was determined by the following equation:

$$\Phi = 1 - I / I_0$$

where  $I_0$  and  $I$  are the emission intensities without and with the presence of TNP.

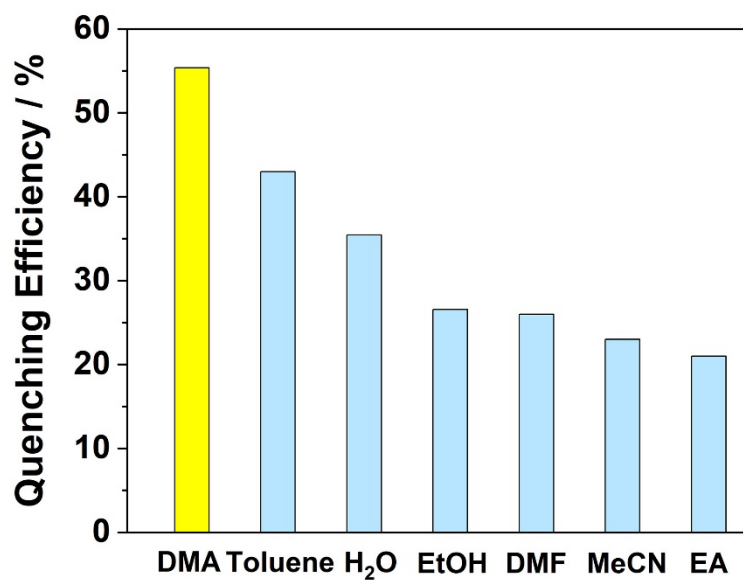

**Fig. S12** Quenching efficiency ( $1 - I / I_0$ ) of **1** by the corresponding TNP solution in different solvent.



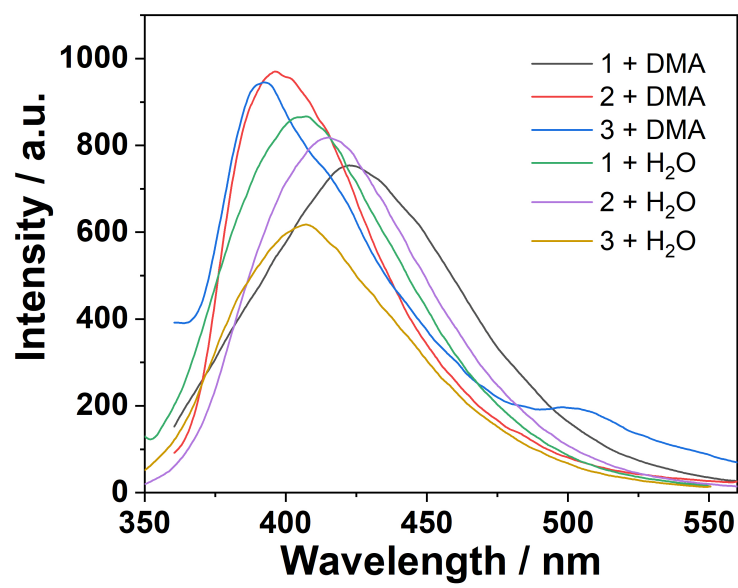

Fig. S13 Fluorescence spectra of 1, 2 and 3 suspended in DMA and H<sub>2</sub>O.

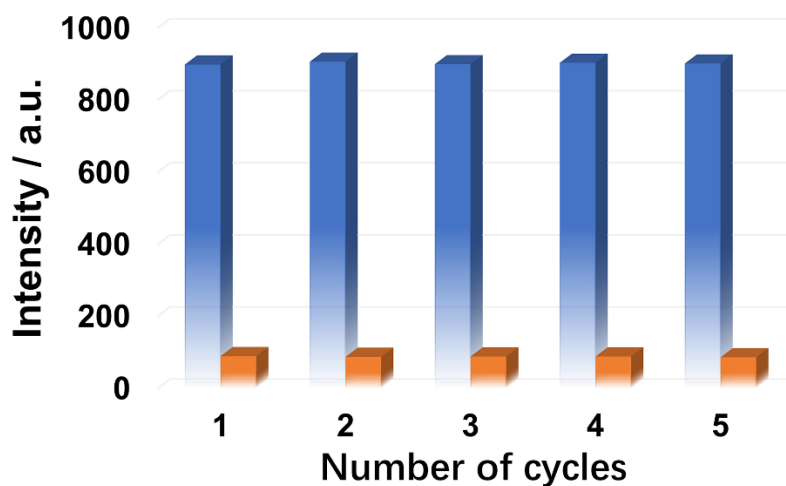

**Fig. S14** Fluorescence quenching and repeatability test for **3** with initial fluorescence intensity (blue) and intensity after quenching (orange).

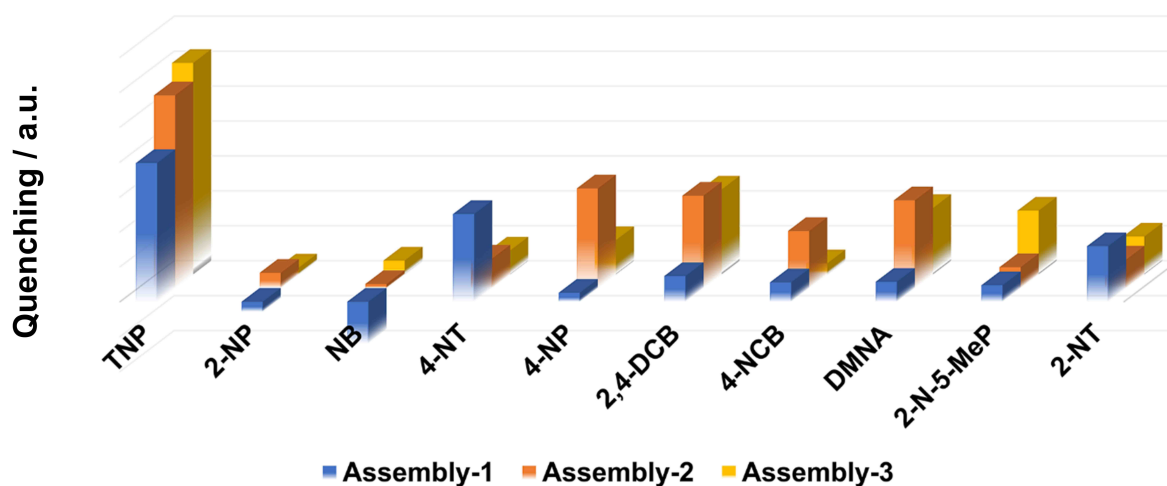

**Fig. S15** Fluorescence quenching of **1**, **2** and **3** upon addition of the same amount of NACs including TNP, 2-nitrophenol (2-NP), nitrobenzene (NB), 4-nitrotoluene (4-NT), 4-nitrophenol (4-NP), 2,4-dinitrochloroben (2,4-DCB), 4-nitrochlorobenzene (4-NCB), 4,5-dimethyl-2-nitroaniline (DMNA), 5-methyl-2-nitrophenol (2-N-5-MeP) and 2-nitrotoluene (2-NT).

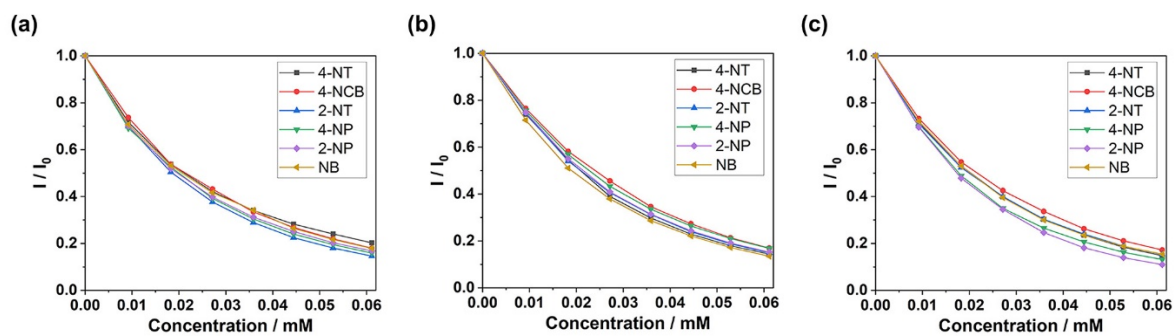

**Fig. S16** Selective detection of TNP on **1** (a), **2** (b) and **3** (c) in the presence of other NACs in DMA suspensions.

The derivation process of the modified Stern-Volmer (S-V) equation is presented below.

Firstly, according to the previous report, the S-V equation was allowed to be written as a function of  $\Phi$  as eqn. S1<sup>11</sup>

$$\Phi = 1 - I / I_0 = 1 - 1 / (1 + K_{sv} Q_t) \quad (S1)$$

where  $\Phi$  is quenching efficiency,  $K_{sv}$  is the S-V constant and  $Q_t$  is the uptake amount of the analyte vapour at time  $t$  by the sensor.

Accordingly,  $Q_t$  is reasonable to be replaced by eqn. S2 since the diffusion or adsorption-controlled process in a solid-state gas sensor can be described by a pseudo-second order kinetics.<sup>11,12</sup>

$$Q_t = Q_\infty k_2 t / (1 + k_2 t) \quad (S2)$$

where  $Q_\infty$  is the uptake amount of analyte vapour at equilibrium and  $k_2 = k Q_\infty$  with  $k$  to be the kinetic constant. The final modified S-V equation can be written as eqn. S3:

$$\Phi = K k_2 t / (1 + k_2 t + K k_2 t) \quad (S3)$$

where  $K = Q_\infty \times K_{sv}$ .

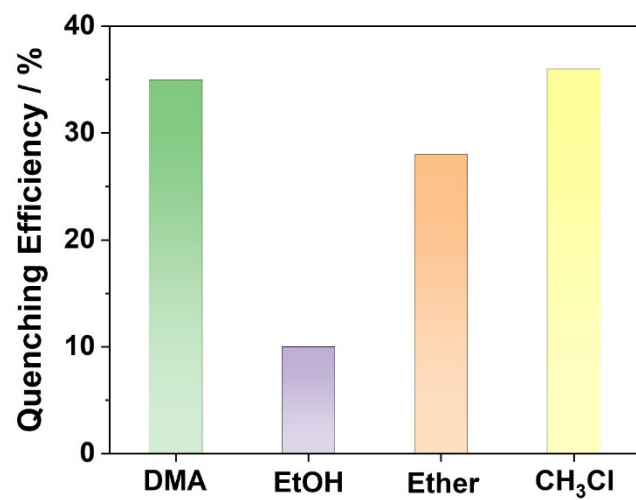

**Fig. S17** Quenching efficiency ( $1-I/I_0$ ) of **2** by adding 2  $\mu$ L 4-MB respectively in DMA, EtOH, ether, and chloroform (CH<sub>3</sub>Cl) suspensions (0.5 mg/mL).

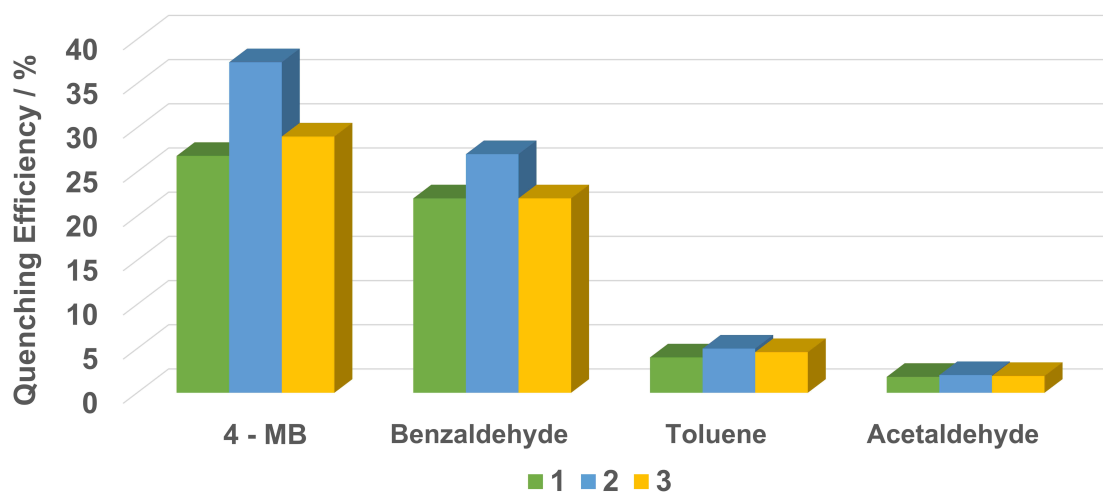

**Fig. S18** Quenching efficiency ( $1-I/I_0$ ) of **1, 2, 3** (0.5 mg/mL) for organic molecules.

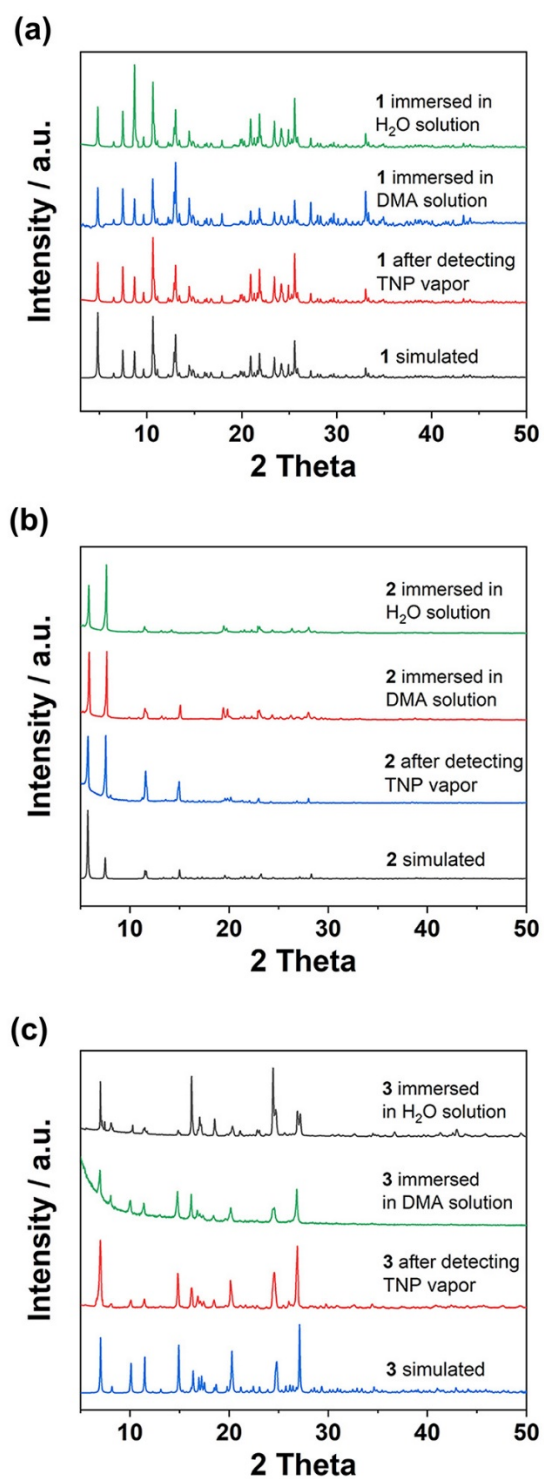

**Fig. S19** PXR D patterns of **1** (a), **2** (b) and **3** (c) before and after immersing in H<sub>2</sub>O or DMA solution of TNP and detecting TNP vapour.

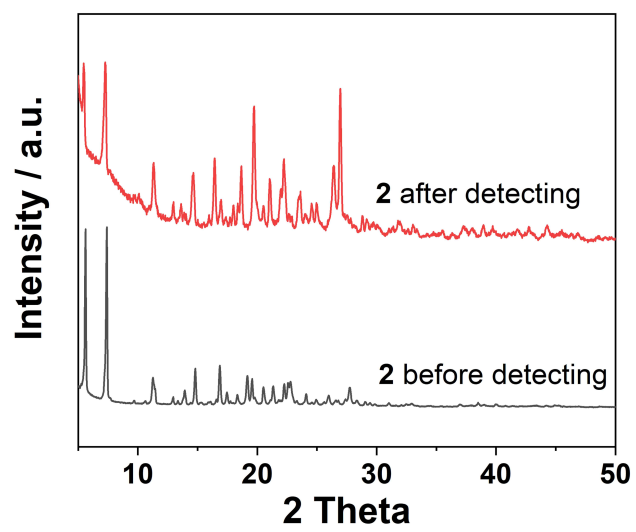

**Fig. S20** PXR D patterns of **2** before and after detecting 4-MB.



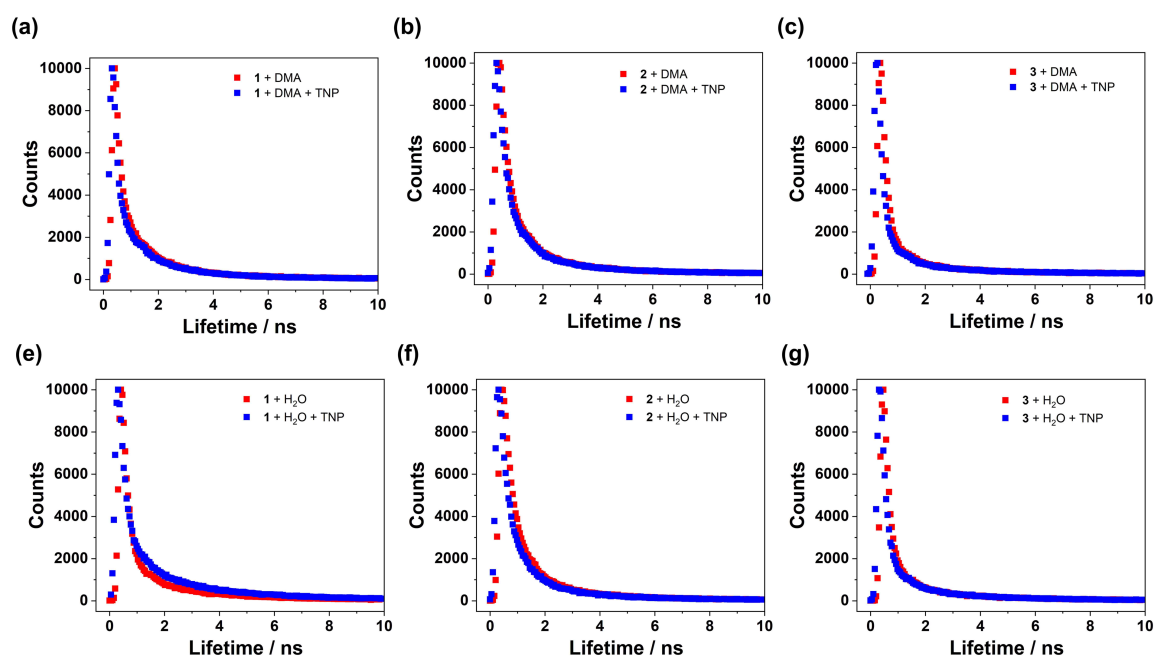

**Fig. S21** Lifetimes of **1** (a), **2** (b) and **3** (c) dispersed in DMA before and after the addition of TNP solution. The solvent was changed to water for **1** (e), **2** (f) and **3** (g).

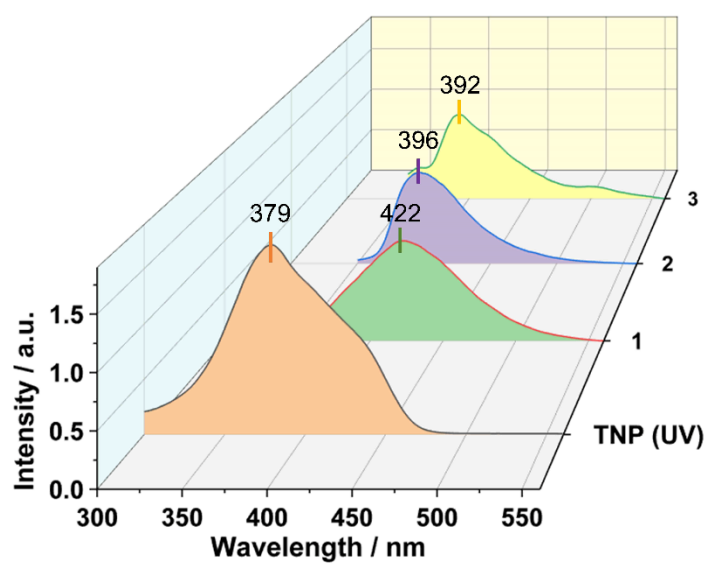

**Fig. S22** Absorption spectra of TNP solution and normalized emission spectra of **1**, **2** and **3** stock suspension in DMA.

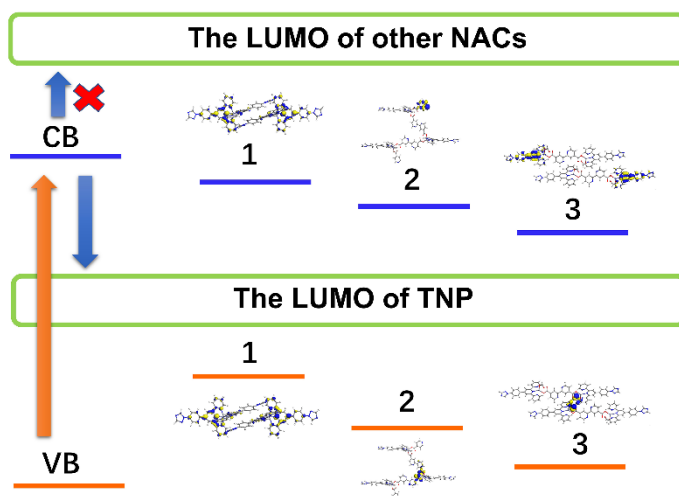

**Fig. S23** Proposed PET process during the fluorescent quenching of **1**, **2** and **3** for TNP.

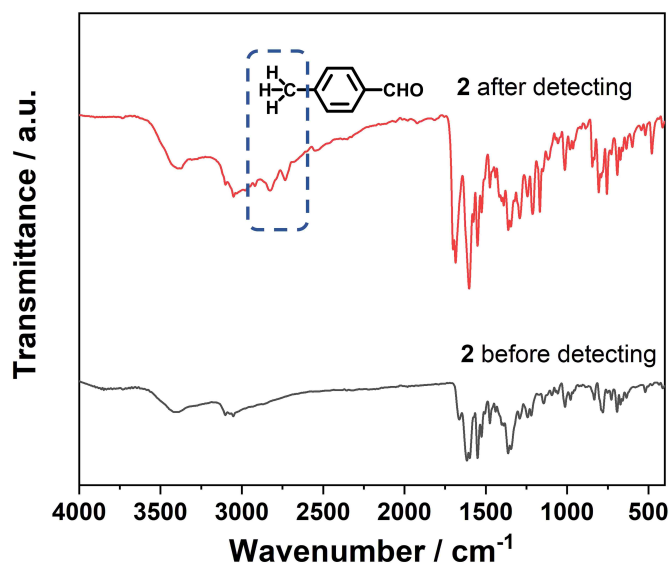

**Fig. S24** FTIR-ATR spectra of **2** before and after detecting 4-MB.

## References

- 1 SAINT, Program for Data Extraction and Reduction, Bruker AXS, Inc, Madison, WI, 2001.
- 2 G. M. Sheldrick, SADABS, Program for Empirical Adsorption Correction of Area Detector Data, University of Göttingen, Germany, 2003.
- 3 G. M. Sheldrick, SHELXT-2014, Program for the Crystal Structure Solution, University of Göttingen, Germany, 2014.
- 4 G. M. Sheldrick, SHELXL-2018, Program for the Crystal Structure Refinement, University of Göttingen, Germany, 2018.
- 5 D. S. P. Van and A. L. Spek, *Acta Cryst.* 1990, **46**, 194-201.
- 6 G. Ferey and C. Serre, *Chem. Soc. Rev.* 2009, **38**, 1380-1399.
- 7 J. M. Soler, E. Artacho, J. D. Gale, A. García, J. Junquera, P. Ordejón and D. Sánchez-Portal, *J. Phys.: Condens. Matter.* 2002, **14**, 2745-2779.
- 8 J. P. Perdew, K. Burke and M. Ernzerhof, *Phys. Rev. Lett.* 1996, **77**, 3865-3868.
- 9 G. Román-Pérez and J. M. Soler, *Phys. Rev. Lett.* 2009, **103**, 096102.

- 10 P. Wang, Z. Li, G. C. Lv, H. P. Zhou, C. Hou, W. Y. Sun and Y. P. Tian, *Inorg. Chem. Commun.* 2012, **18**, 87-91.
- 11 F. G. Moscoso, J. Almeida, A. Sousaraei, T. Lopes-Costa, A. M. G. Silva, J. Cabanillas-Gonzalez, L. Cunha-Silva and J. M. Pedrosa, *J. Mater. Chem. C* 2020, **8**, 3626-3630.
- 12 J. P. Simonin, *Chem. Eng. J.* 2016, **300**, 254-263.
- 13 Z. F. Qiu, S. M. Zhao, Z. H. Xu, Y. Zhao, Z. L. Wang and W. Y. Sun, *Cryst. Growth Des.* 2021, **21**, 5306–5316.
- 14 K. Sheeba, D. Prasenjit and K. M. Sanjay, *Inorg. Chem.* 2020, **59**, 4588–4600.
- 15 G. Pritam, K. S. Sourav, R. Additi and B. Priyabrata, *Eur. J. Inorg. Chem.* 2015, **17**, 2851-2857.
- 16 J. C. Jin, J. Wu, Y. X. He, B. H. Li, J. Q. Liu, R. Prasad, A. Kumar and S. R. Batten, *CrystEngComm*, 2017, **19**, 6464-6472.
